# Supplementary material for: The Word Superiority Effect: Modulation by Familiarity, Handwriting, and Inversion
Source: Research Square preprint supplement (doi:10.21203/rs.3.rs-7614278/v1), 2025-10-08
Supplement: Supplementary file 1 [file 303394e562eecf994ef04b14.docx]

**APPENDIX A**

*A. Accuracy performance*

Accuracy performance from each condition was analyzed with a repeated-measures ANOVA, with language familiarity (familiar, unfamiliar), orientation (upright, inverted), style (font, handwriting) and word type (word, pseudoword) as within-subject factors. The effect sizes in the ANOVAs were measured by computing the Partial Eta Squared ( ). Significant differences were explored by Bonferroni-corrected post hoc pair-wise comparisons (corrected p-values are reported).

The ANOVA revealed significant main effects of familiarity (F(1,39) = 369.4, p < .001, = 0.905), orientation (F(1,39) = 26.5, p < .001, 0.405), word type (F(1,39) = 18.9, p < .001, 0.326) and style (F(1,39) = 11.9, p = .001, 0.235). Performance was better for the familiar over unfamiliar language (familiar mean = 0.820, SE = 0.018 and unfamiliar mean = 0.544, SE = 0.011), for inverted over upright stimuli (upright mean = 0.658, SE = 0.015 and inverted mean = 0.708, SE = 0.012), for words over pseudowords (word mean = 0.711, SE = 0.010 and pseudoword mean = 0.655, SE = 0.018), and for font over handwriting (font mean = 0.695, SE = 0.014 and pseudoword mean = 0.671, SE = 0.013). The interactions between language familiarity and word type (F(1,39) = 31.9, p < .001, = 0.450), orientation and word type (F(1,39) = 6.6, p = .014, = 0.145) were significant, as well as the triple interactions between familiarity, orientation and word type (F(1,39) = 4.4, p = .042, = 0.102) and familiarity, word type and style (F(1,39) = 4.5, p = .040, = 0.104). Pair wise contrasts to explore these interactions showed that the difference between word and pseudowords was significant for only the familiar language (word mean = 0.877, SE = 0.012; pseudoword mean = 0.763, SE = 0.028; p < .001) but not the unfamiliar one (word mean = 0.544, SE = 0.012, pseudoword mean = 0.548, SE = 0.011; p = 1.00). The difference between words and pseudowords was larger in the upright orientation (mean difference = 0.076, SE = 0.018; p <.001) than in the inverted one (mean difference = 0.033, SE = 0.011; p =.036), though the latter was still significant. Last, the triple interactions showed that the orientation and word type effects were present only for the familiar language.

Thus, to clarify the effects of orientation and style in the familiar language we performed a secondary repeated-measures ANOVA on the accuracy data from the familiar language only, using word type, orientation, and style as within-subject factors. There was a significant main effect of orientation (F(1,39) = 18.2, p = < .001, = 0.318), with better performance for inverted stimuli (mean = 0.855, SE = 0.019) than upright stimuli (mean = 0.786, SE = 0.021), a significant main effect of word type (F(1,39) = 26.7, p = < .001, = 0.406), with better performance with words (mean = 0.877, SE = 0.012) than pseudowords (mean = 0.763, SE = 0.028), and a significant main effect of style (F(1,39) = 26.2, p < .001, = 0.401), with better performance with font (mean = 0.837, SE = 0.020) than handwriting (mean = 0.803, SE = 0.017). The interaction between orientation and word type was significant (F(1,39) = 8.2, p = .0007, = 0.175), with a larger difference between pseudoword and word stimuli in the upright orientation (mean difference = 0.154, SE = 0.031; p < .001) compared the inverted one (mean difference = 0.074, SE = 0.020; p = .004), though again, the latter was still significant. The interaction between word type and style was also significant (F(1,39) = 10.1, p = .003, = 0.206), showing that the difference between fond and handwriting stimuli was significant for the real words (mean difference = 0.053, SE = 0.007; p < .001) but not for pseudowords (mean difference = 0.015, SE = 0.011; p = 1.00).

Lastly, we calculated *word superiority effect,* as the subtraction between word and pseudoword accuracy performance, with a positive result indicating better performance for words. For each of the eight possible combinations of orientation, style and familiarity, we used one-sample tests to determine if there was a significant *word superiority effect* in a condition. Bonferroni correction indicated a threshold of 0.0068 to reach alpha of 0.05 for 8 comparisons. Then, to see how the *word superiority effect* varied across conditions for the familiar language, we performed an ANOVA with orientation and style as within-subject factors.

This analysis confirmed the preceding results. For the familiarity language, there was a significant *word superiority effect* for upright font (mean = 0.175, SE = 0.033; t(39) = 5.38, p < .0001), upright handwriting (mean = 4.16, SE = 0.032; t(39) = 3.89, p < .0001), inverted font (mean = 0.091, SE = 0.023; t(39) = 3.94, p < .0003), and inverted handwriting (mean = 0.057, SE = 0.019; t(39) = 2.91, p < .057). None of the conditions for the unfamiliar language showed a significant *word superiority effect*.

The repeated-measures ANOVA on the data for the familiar language showed a significant main effect of orientation (F(1,39) = 8.2, p = .007, = 0.175), with a greater *word superiority effect* in the upright (mean = 0.154, SE = 0.031) than inverted orientation (mean = 0.074, SE = 0.029) and a significant main effect of style (F(1,39) = 10.1, p = .003, = 0.206), with a greater *word superiority effect* for font (mean = 0.133, SE = 0.16024 than handwriting (mean = 0.095, SE = 0.17022 . The interaction between style and orientation (F(1,39) = 0.11, p = .739, = 0.003) was not significant.

*B. Response times performance*

The same analyses were repeated for response times. So first, response times were analyzed with a repeated-measures ANOVA, with language familiarity (familiar, unfamiliar), orientation (upright, inverted), style (font, handwriting) and word type (word, pseudoword) as within-subject factors. This ANOVA only revealed a significant main effect of style (F(1,39) = 4.3, p = .044, = 0.100), with longer response times for handwriting (mean = 1616 ms, SE = 88 ms) than font (mean = 1540 ms, SE = 81 ms). The interaction between familiarity and word type was marginally significant (F(1,39) = 3.90, p = .056, = 0.091): response times difference between real words and pseudowords was marginally significant for the familiar langiage (mean difference = 86 ms, SE = 43 ms; p = .068) but not significant for the unfamiliar language (mean difference = -20 ms , SE = 40 ms; p = 1.000).

We then performed a secondary repeated-measures ANOVA on the response times data from the familiar language only, using word type, orientation, and style as within-subject factors. There a significant main effect of word type (F(1,39) = 7.1, p = = .011, = 0.153), with faster responses with words (mean = 1558 ms, SE = 101 ms) than pseudowords (mean = 1644 ms, SE = 85 ms), and a significant main effect of style (F(1,39) = 4.8, p = .034, = 0.110), with faster responses with font (mean = 1536 ms, SE = 86 ms) than handwriting (mean = 1667 ms, SE = 114 ms).

Finally, we calculated *word superiority effect,* as the subtraction between the response times in the pseudoword and word conditions, with a positive result indicating faster responses for words. For each of the eight possible combinations of orientation, style and familiarity, we used one-sample tests to determine if there was a significant *word superiority effect* in a condition. Then, to see how the *word superiority effect* varied across conditions for the familiar language, we performed an ANOVA with orientation and style as within-subject factors.

The only significant *word superiority effect* was found for upright font in the familiar language (mean = 105 ms, SE = 44 ms; t(39) = 2.38, p = .022). None of the main effects of orientation and word style, nor the interaction, were significant in the repeated-measures ANOVA on the data for the familiar language.
